# Supplementary material for: Submicron Ti2CTxMXene particulates as high-rate intercalation anode materials for Li-ion batteries
Source: Royal Society of Chemistry journal article supplement (doi:10.1039/d2ta03050k), 2022-01-01
Supplement: d2ta03050k1.pdf [file d2ta03050k1.pdf]

## Electronic Supplementary Information

### Submicron $\text{Ti}_2\text{CT}_x$ MXene Particulates as High-Rate Intercalation Anode

#### Materials for Li-Ion Batteries

Cong Cui,<sup>ab</sup> Ruqiao Dai,<sup>ab</sup> Chao Zhang,<sup>a</sup> Bingbing Fan<sup>c</sup> and Xiaohui Wang<sup>\*a</sup>

<sup>a</sup> *Shenyang National Laboratory for Materials Science, Institute of Metal Research, Chinese Academy of Sciences, Shenyang 110016, China.*

<sup>b</sup> *School of Materials Science and Engineering, University of Science and Technology of China, Shenyang 110016, China.*

<sup>c</sup> *School of Materials Science and Engineering, Zhengzhou University, Zhengzhou 450001, China*

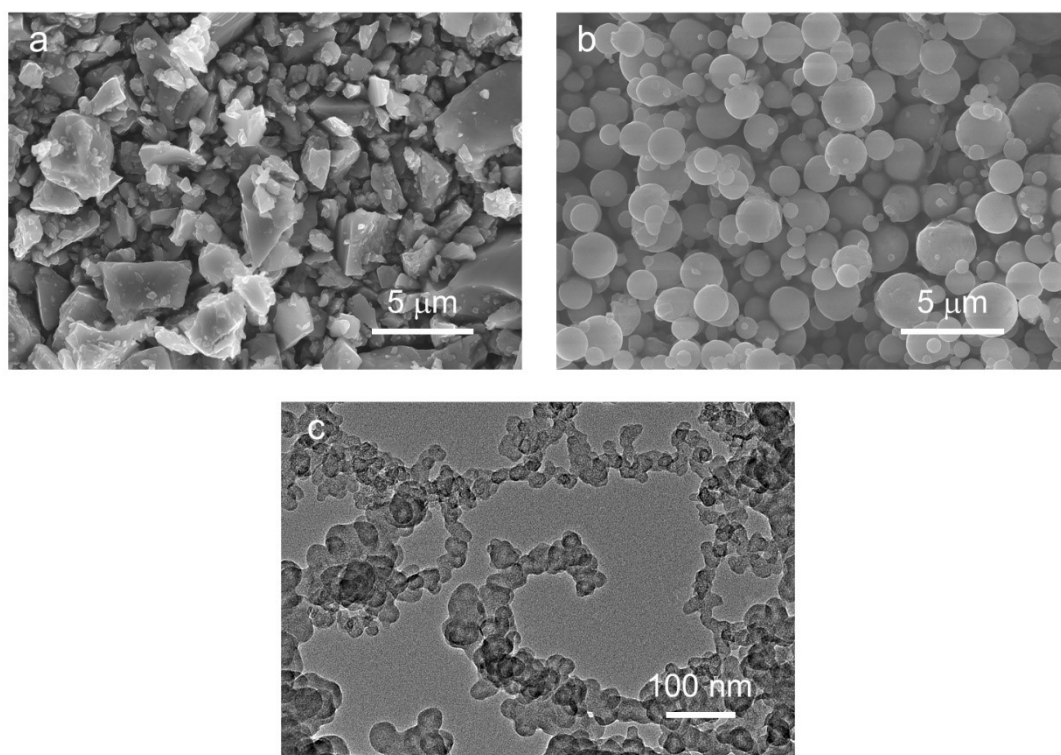

**Fig. S1.** SEM images of (a)  $\text{TiH}_2$  and (b) Al and TEM image of (c) carbon black.

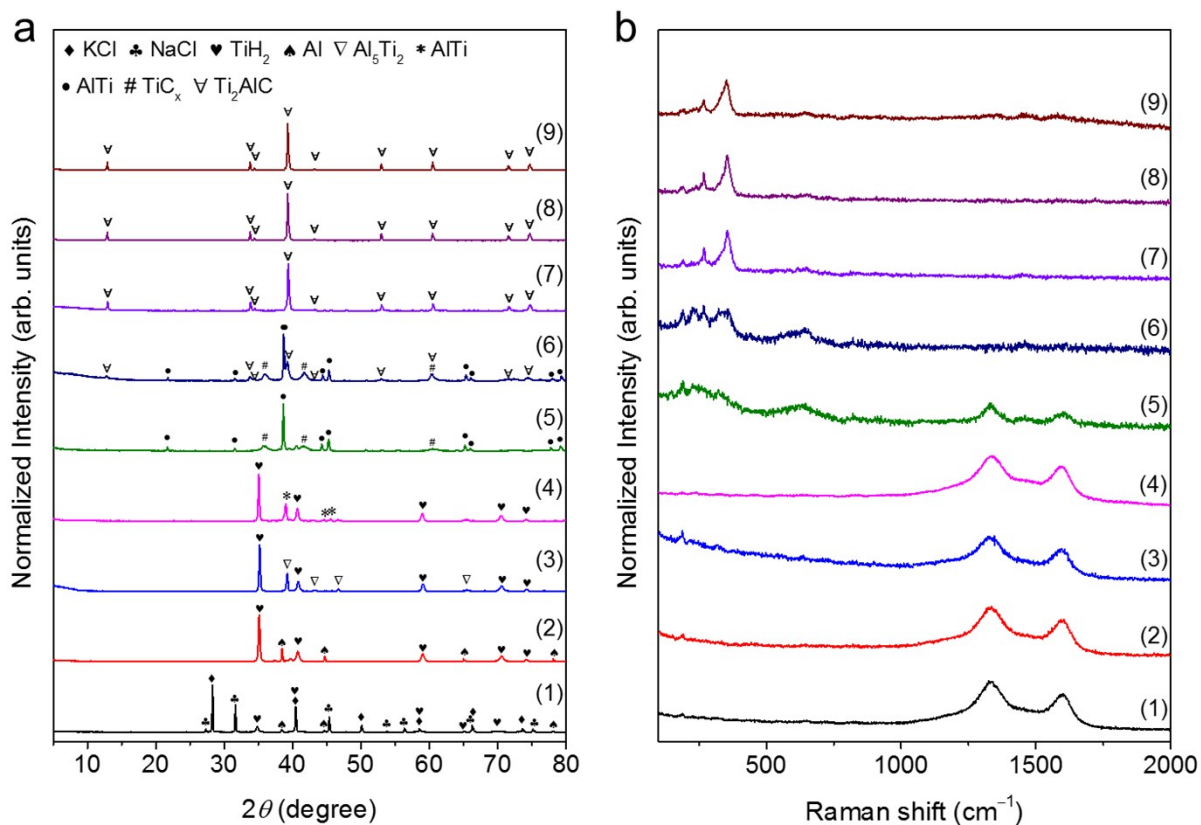

**Fig. S2.** (a) XRD patterns and (b) Raman spectra of samples. The numbers represent the (1) pristine mixed powder and the samples synthesized at (2) 500°C for 1 h, (3) 600°C for 1 h, (4) 700 °C for 1 h, (5) 800 °C for 1 h, (6) 900 °C for 1 h, (7) 1000 °C for 1 h, (8) 1000 °C for 3 h, and (9) 1000 °C for 5 h.

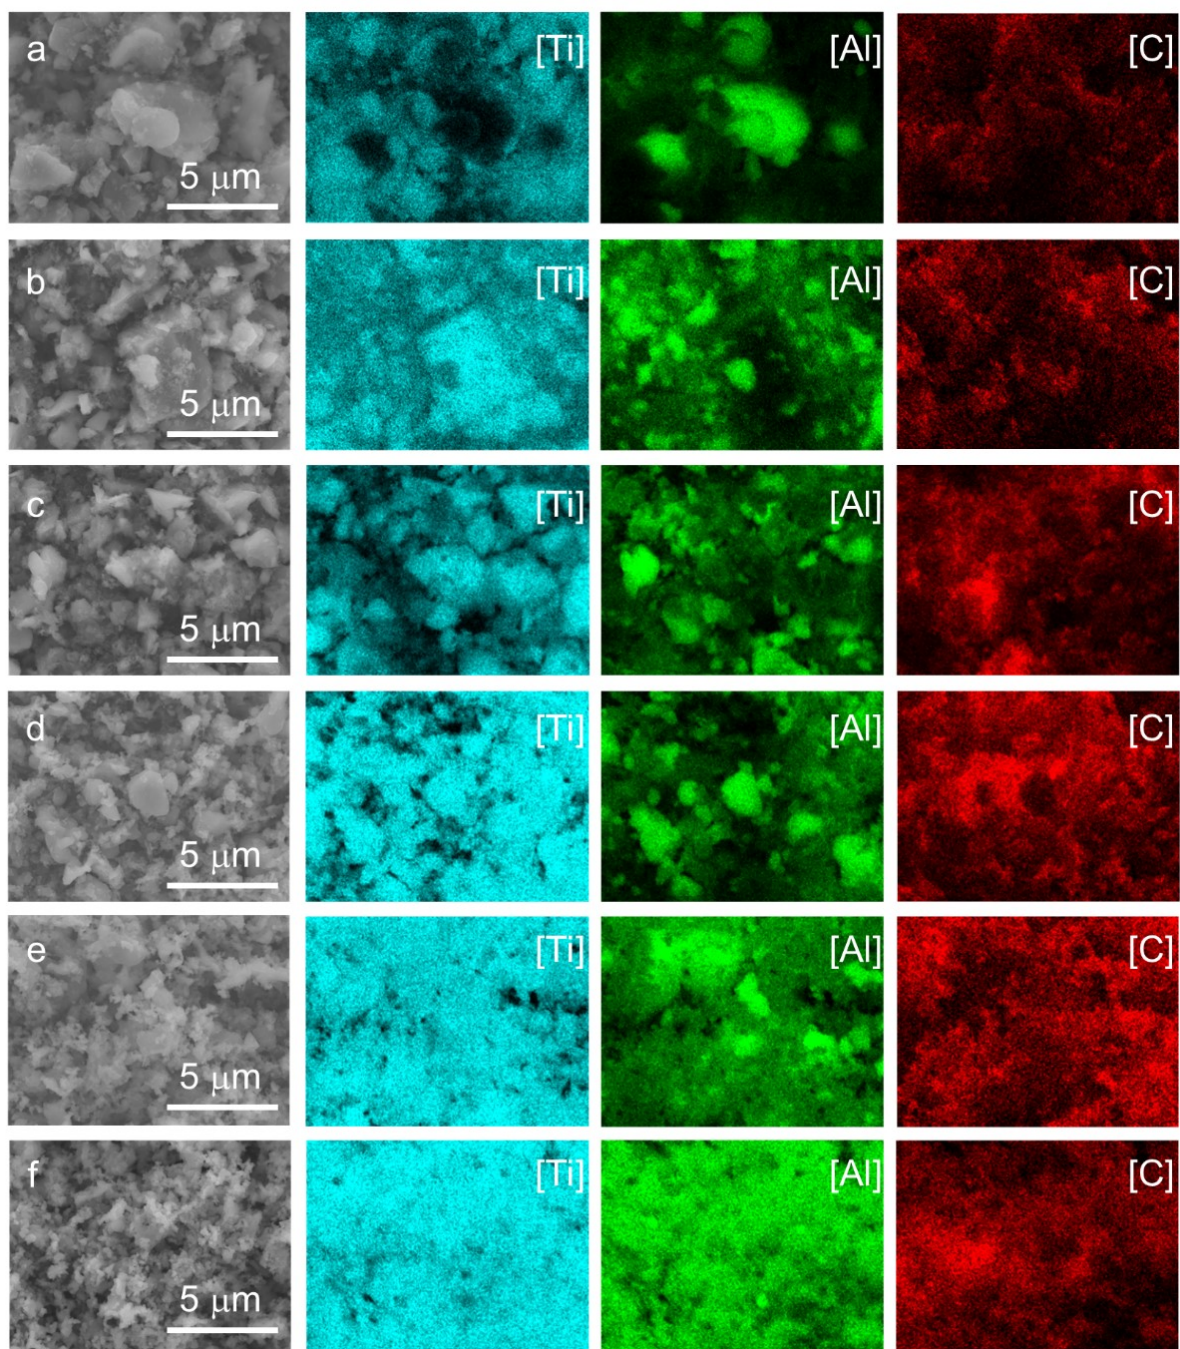

**Fig. S3.** SEM images and corresponding EDS mappings of the samples synthesized at (a) 500 °C, (b) 600 °C, (c) 700 °C, (d) 800 °C, (e) 900 °C, and (f) 1000 °C for 1 h.



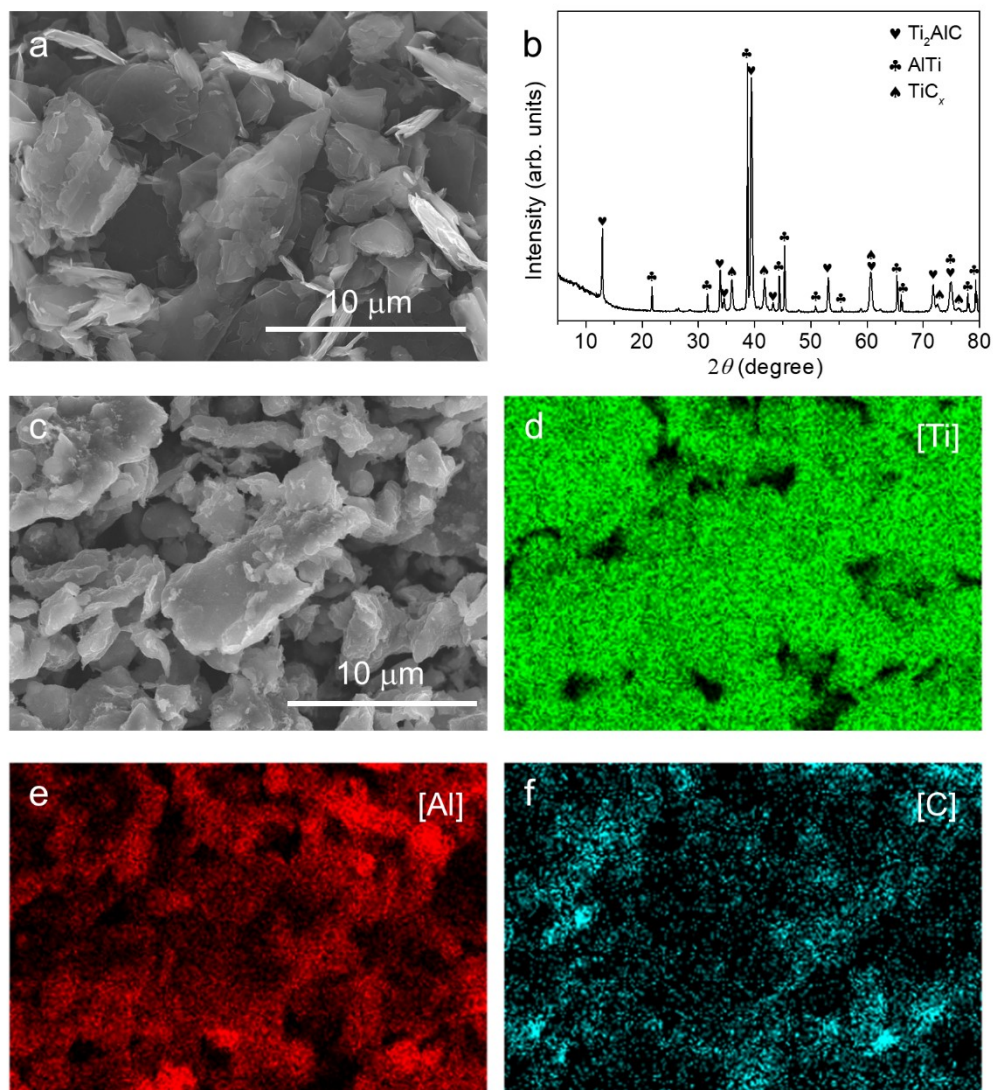

**Fig. S4.** (a) SEM image of micron graphite, (b) XRD pattern of the sample synthesized at 1000 °C for 1 h using micron graphite as carbon source, (c) SEM image of the as-prepared sample and corresponding EDS mapping results of (d) Ti, (e) Al, and (f) C

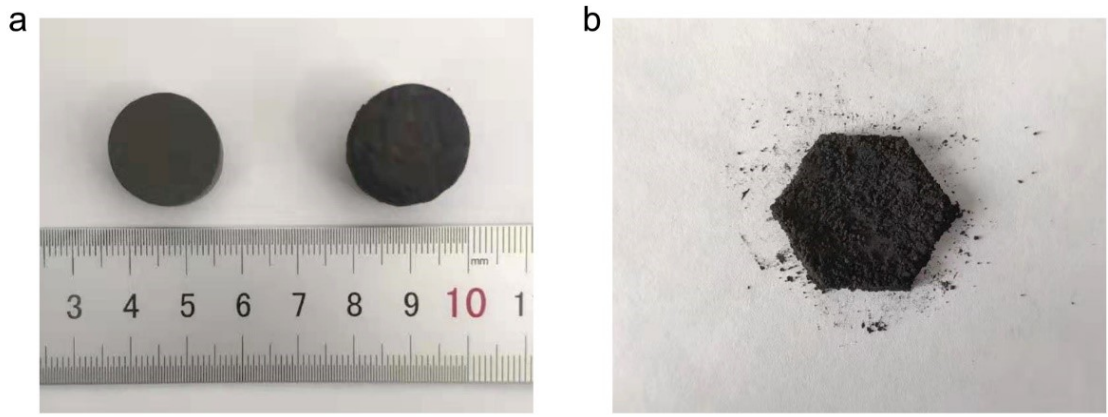

**Fig. S5.** Optical photographs of (a) cold-isostatic-pressing-treated reactant before (left) and after (right) heating at 1000 °C for 1 h, and (b)  $\text{Ti}_2\text{AlC}$  powder synthesized at 1000 °C for 1 h.

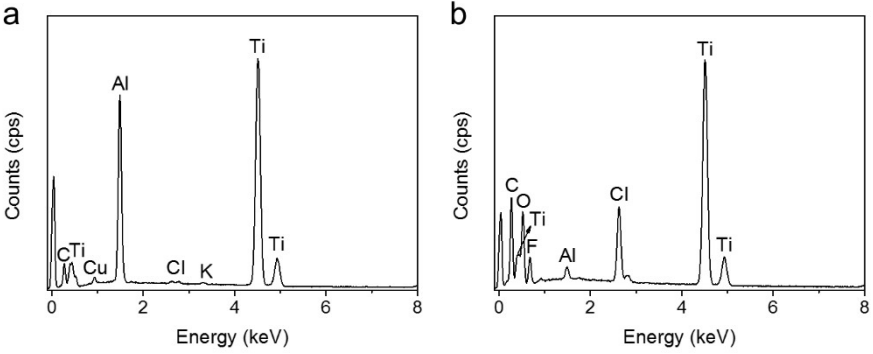

**Fig. S6.** EDS spectra of (a)  $\text{Ti}_2\text{AlC}$  synthesized by molten salt method at 1000 °C for 1 h and (b) etched  $\text{Ti}_2\text{CT}_x$  at 35 °C for 36 h. The signal of Cu is from copper sample holder.

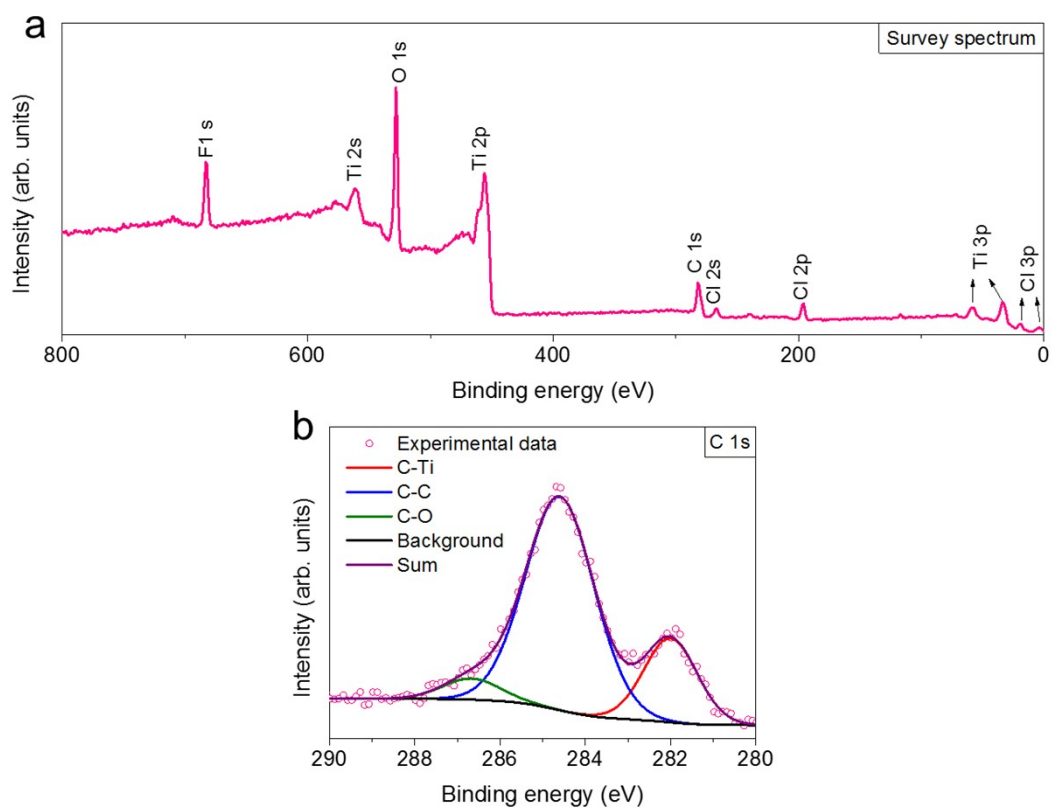

**Fig. S7.** (a) XPS survey spectrum of  $\text{Ti}_2\text{CT}_x$ . (b) High-resolution XPS spectrum of C 1s.

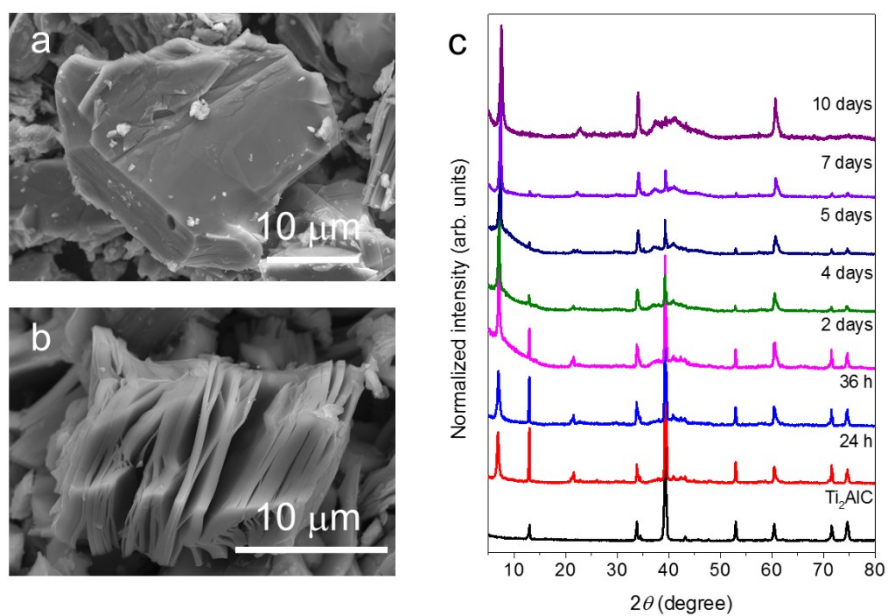

**Fig. S8.** SEM images of (a)  $-200$  mesh  $\text{Ti}_2\text{AlC}$  and (b)  $1\text{-Ti}_2\text{CT}_x$  etched for 10 days. (c) Phase evolution of  $-200$  mesh  $\text{Ti}_2\text{AlC}$  along with etching time.

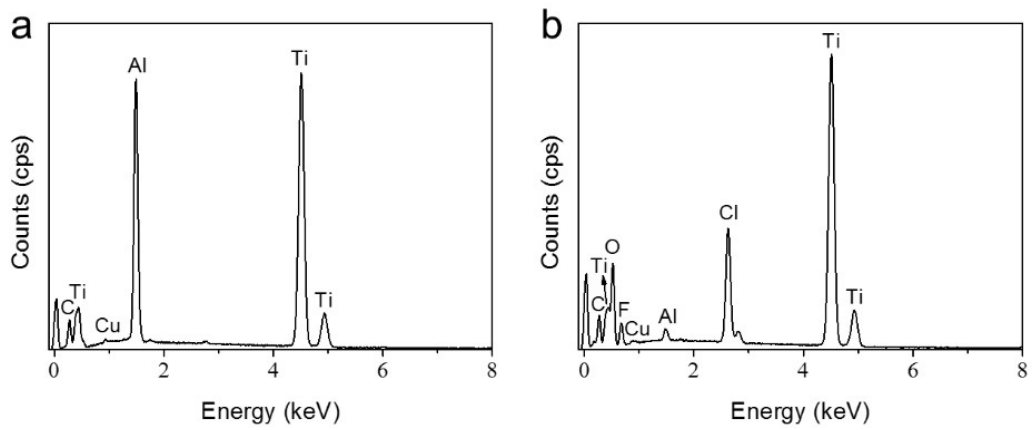

**Fig. S9.** EDS spectra of (a)  $\text{Ti}_2\text{AlC}$  synthesized by solid-liquid reaction and (b)  $1\text{-Ti}_2\text{CT}_x$  etched at  $35\text{ }^\circ\text{C}$  for 10 days. The signal of Cu is from copper sample holder.

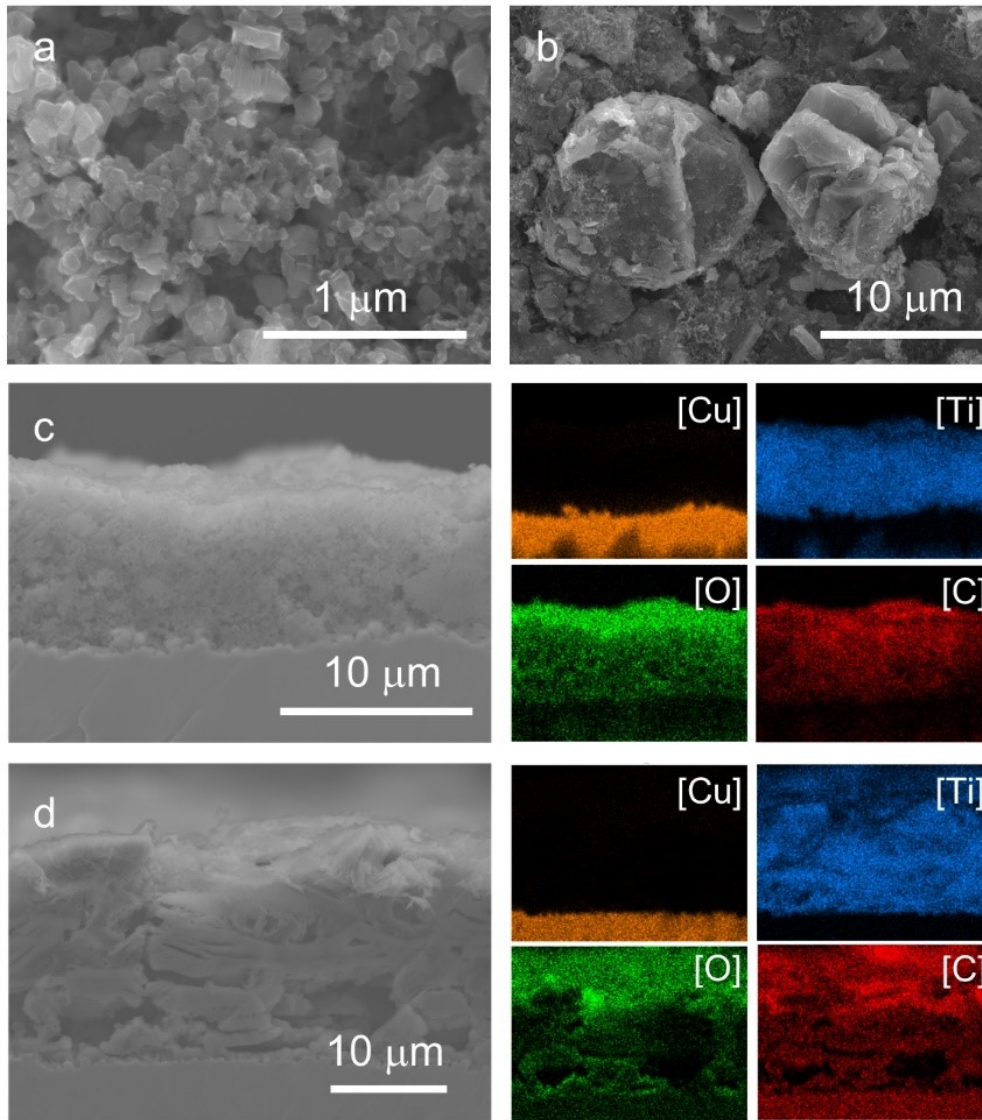

**Fig. S10.** SEM images of (a) s-Ti<sub>2</sub>CT<sub>x</sub> and (b) l-Ti<sub>2</sub>CT<sub>x</sub>. Cross section morphologies and EDS mapping results of (c) s-Ti<sub>2</sub>CT<sub>x</sub> and (d) l-Ti<sub>2</sub>CT<sub>x</sub>.



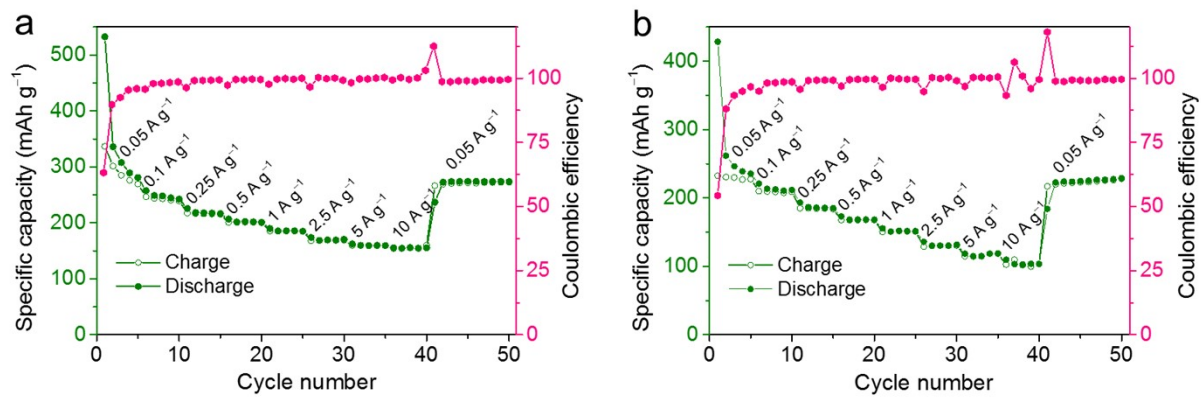

**Fig. S11.** Rate performances of (a) s- $\text{Ti}_2\text{CT}_x$  and (b) l- $\text{Ti}_2\text{CT}_x$ .

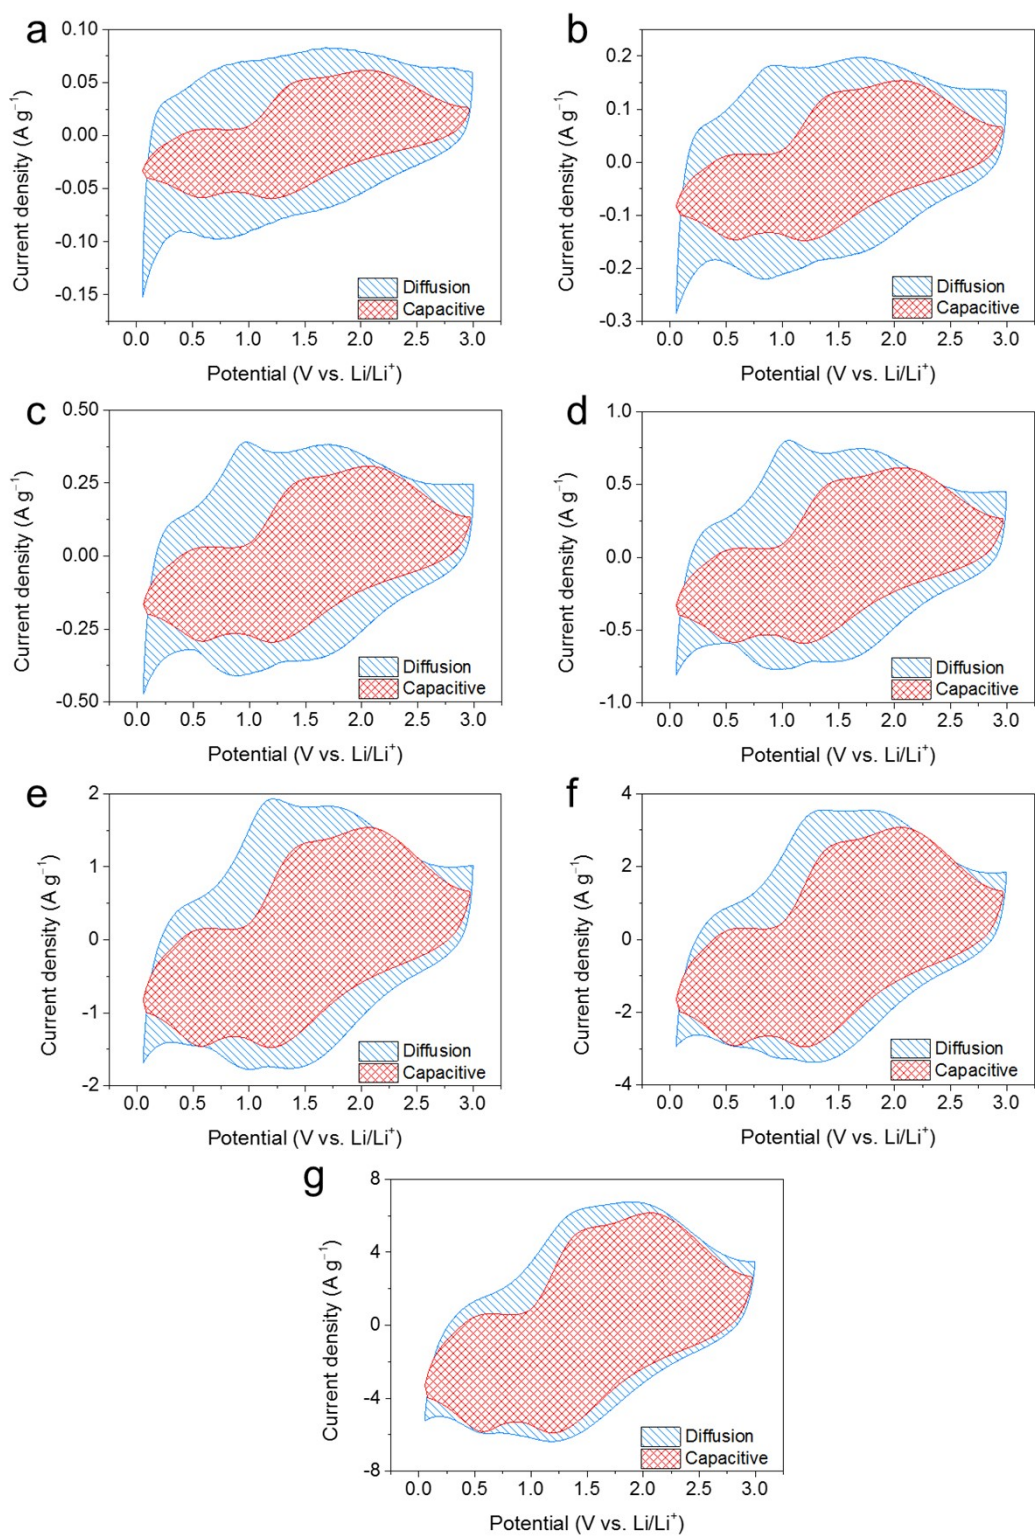

**Fig. S12.** Determination of capacitive contribution of s-Ti<sub>2</sub>CT<sub>x</sub> from the CV data. (a) 0.2 mV s<sup>-1</sup>, (b) 0.5 mV s<sup>-1</sup>, (c) 1 mV s<sup>-1</sup>, (d) 2 mV s<sup>-1</sup>, (e) 5 mV s<sup>-1</sup>, (f) 10 mV s<sup>-1</sup>, and (g) 20 mV s<sup>-1</sup>.

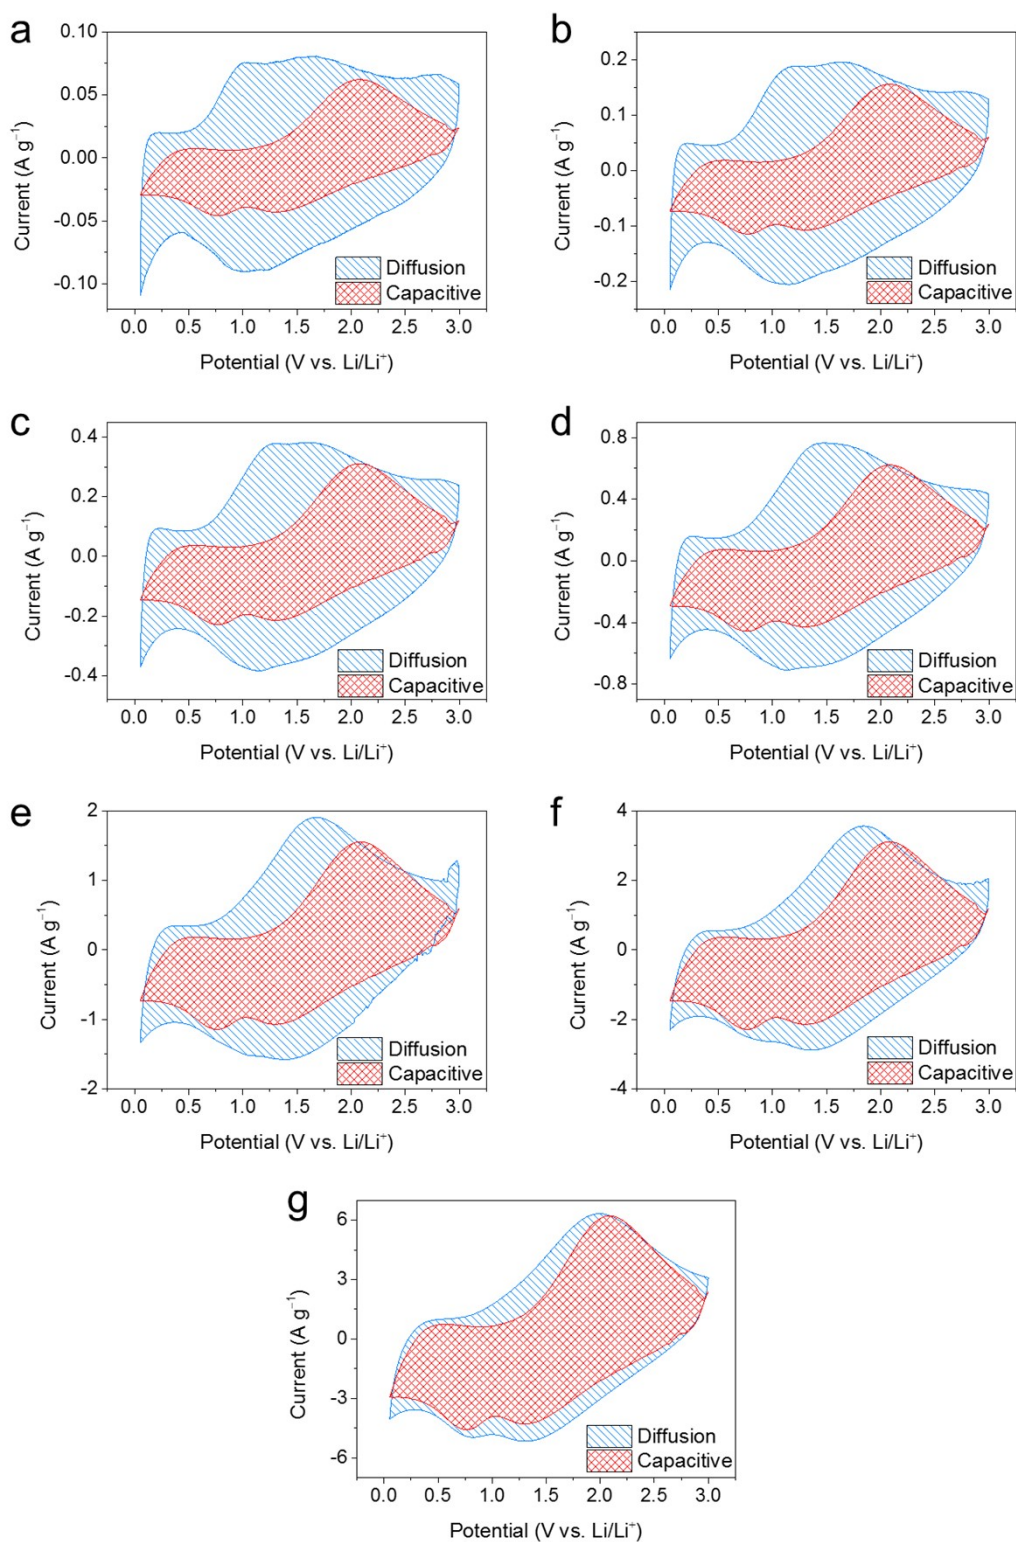

**Fig. S13.** Determination of capacitive contribution of 1-Ti<sub>2</sub>CT<sub>x</sub> from the CV data. (a) 0.2 mV s<sup>-1</sup>, (b) 0.5 mV s<sup>-1</sup>, (c) 1 mV s<sup>-1</sup>, (d) 2 mV s<sup>-1</sup>, (e) 5 mV s<sup>-1</sup>, (f) 10 mV s<sup>-1</sup>, and (g) 20 mV s<sup>-1</sup>.

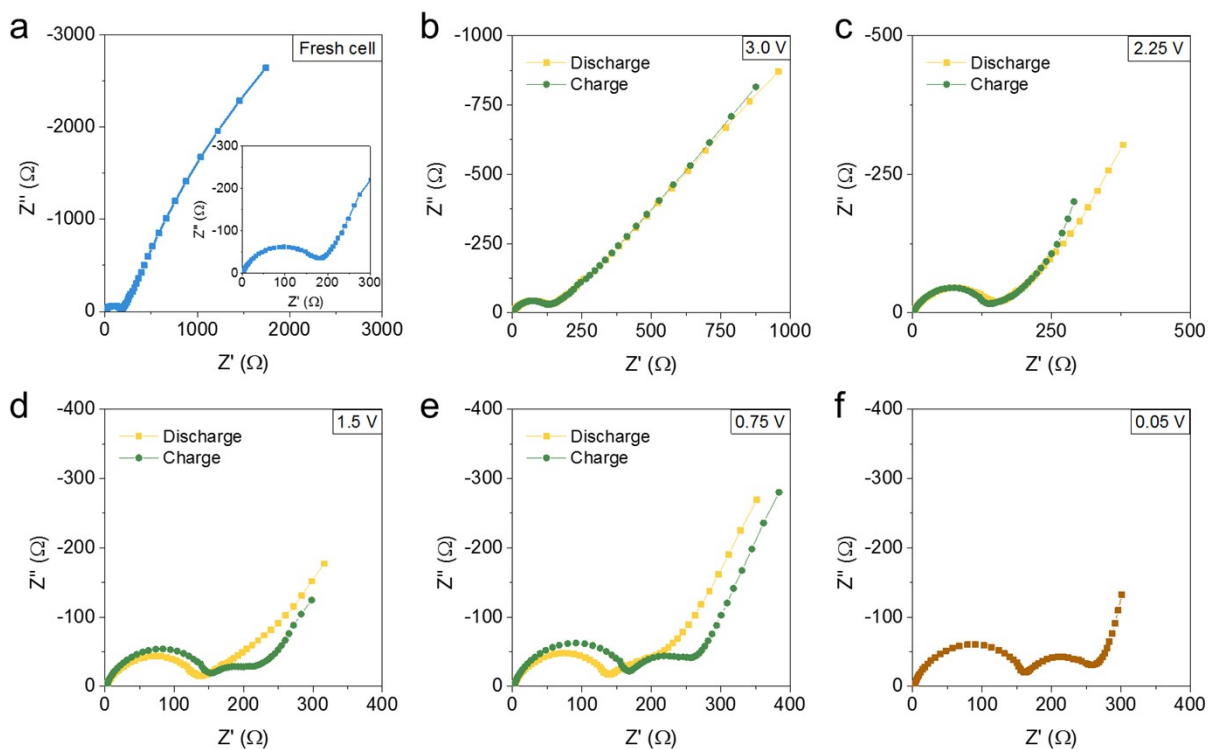

**Fig. S14.** EIS spectra of 1- $\text{Ti}_2\text{CT}_x$  collected at designed potentials. (a) Fresh cell. (b) 3.0 V. (c) 2.25 V. (d) 1.5 V. (e) 0.75V. (f) 0.05V.

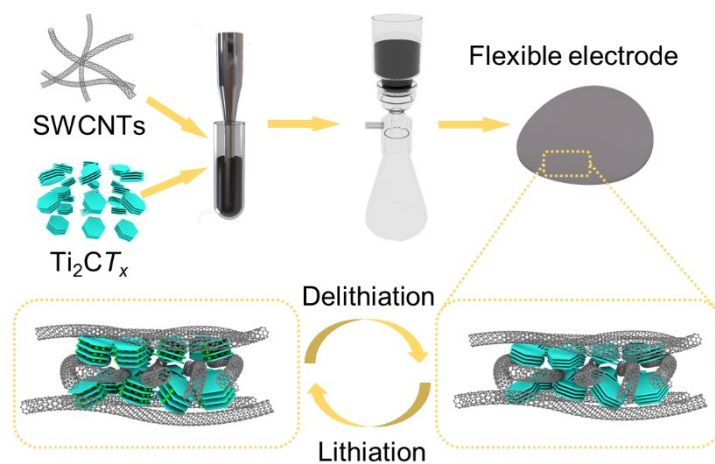

**Fig. S15.** Schematic illustration of fabricating free-standing s- $\text{Ti}_2\text{CT}_x$ /SWCNTs flexible electrode.



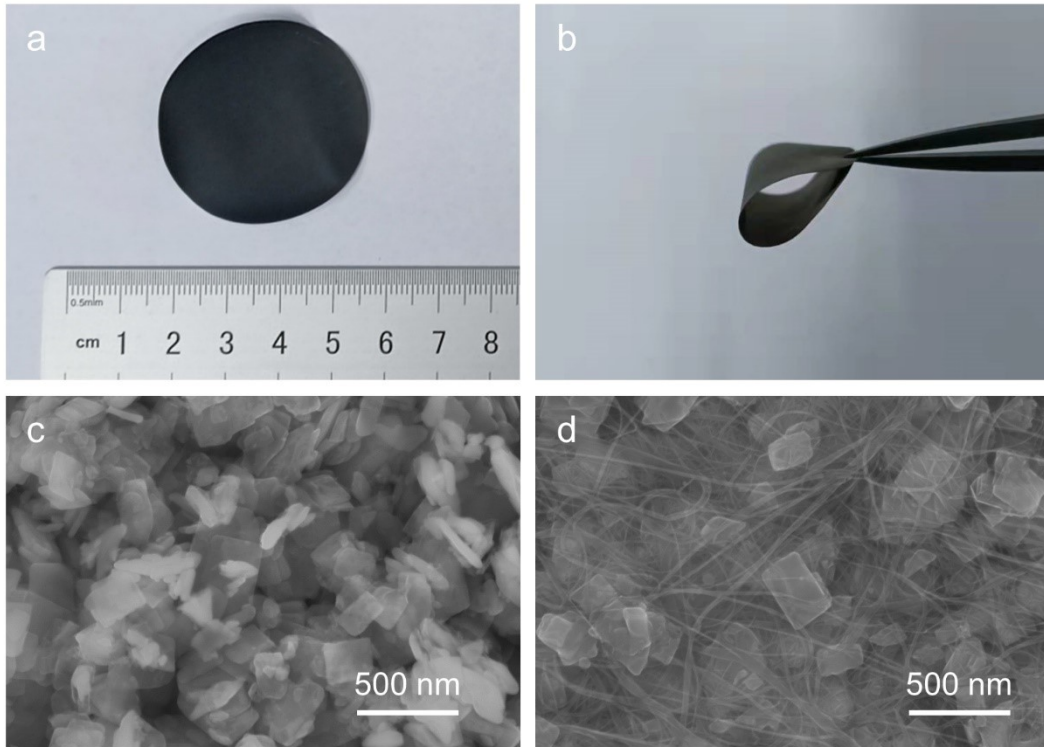

**Fig. S16.** (a-b) Optical photographs of [100]-LiFePO<sub>4</sub>/C/SWCNTs flexible electrode, (c) SEM image of [100]-LiFePO<sub>4</sub>/C, (d) SEM image of [100]-LiFePO<sub>4</sub>/C/SWCNTs free-standing flexible electrode.

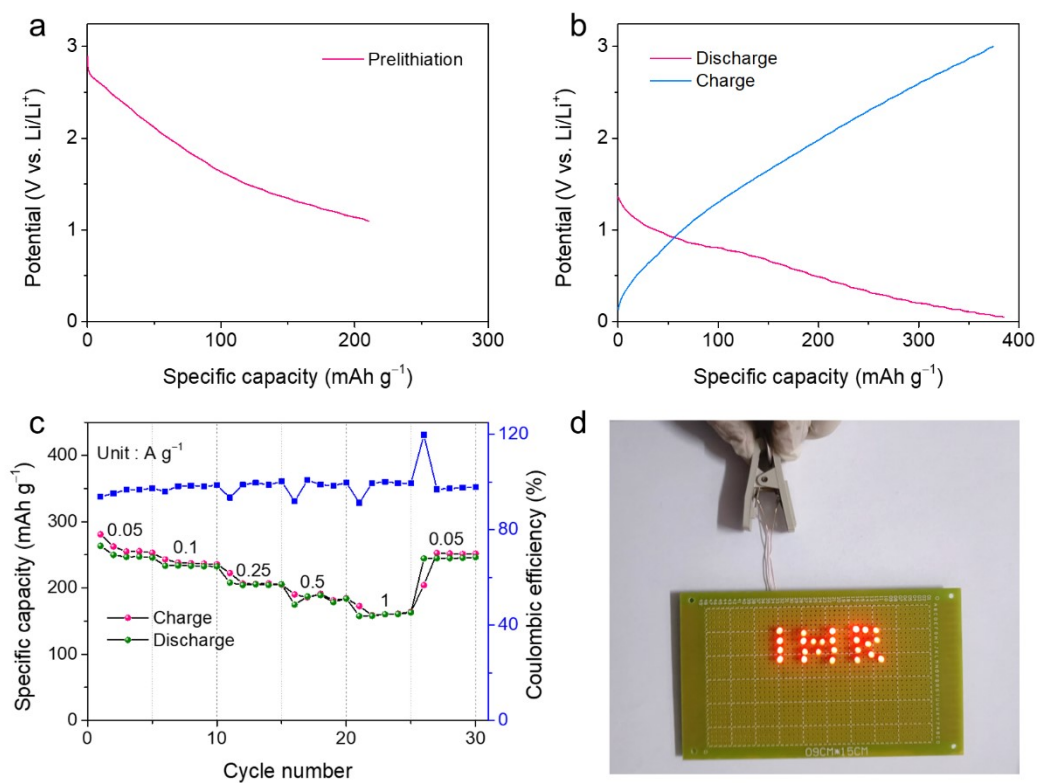

**Fig. S17.** (a) Discharge curve of s-Ti<sub>2</sub>CT<sub>x</sub>/SWCNTs electrode in the process of prelithiation, (b) initial discharge-charge curve of s-Ti<sub>2</sub>CT<sub>x</sub>/SWCNTs electrode, (c) rate performance of a full cell based on prelithiated s-Ti<sub>2</sub>CT<sub>x</sub>/SWCNTs anode and [100]-LiFePO<sub>4</sub>/C/SWCNTs cathode, and (d) optical photograph of the full cell lighting up 25 LED lights.

**Table S1.** Atomic percentage of small-sized  $\text{Ti}_2\text{AlC}$  synthesized by molten salt method at 1000 °C for 1 h and  $s\text{-Ti}_2\text{CT}_x$  MXene.

| Samples                    | C     | Al    | Cl   | K    | Ti    | Cu   | O     | F    |
|----------------------------|-------|-------|------|------|-------|------|-------|------|
| $\text{Ti}_2\text{AlC}$    | 33.73 | 19.96 | 0.24 | 0.23 | 44.8  | 1.05 | -     | -    |
| $s\text{-Ti}_2\text{CT}_x$ | 38.40 | 0.54  | 3.39 | -    | 19.38 | -    | 29.84 | 8.45 |

**Table S2.** Binding energies for  $s\text{-Ti}_2\text{CT}_x$ .

| Binding Type                 | Binding energy (eV)    |                        |
|------------------------------|------------------------|------------------------|
| C–Ti                         | 282.0 (C 1s)           |                        |
| C–C                          | 284.6 (C 1s)           |                        |
| C–O                          | 286.7 (C 1s)           |                        |
| Ti–C                         | 454.5 (Ti $2p_{3/2}$ ) | 460.0 (Ti $2p_{1/2}$ ) |
| Ti– $T_x$ (II)               | 455.5 (Ti $2p_{3/2}$ ) | 461.0 (Ti $2p_{1/2}$ ) |
| Ti– $T_x$ (III)              | 457.0 (Ti $2p_{3/2}$ ) | 462.5 (Ti $2p_{1/2}$ ) |
| Ti (IV)                      | 458.6 (Ti $2p_{3/2}$ ) | 464.1 (Ti $2p_{1/2}$ ) |
| O–Ti ( $\text{TiO}_2$ )      | 530.1 (O 1s)           |                        |
| O–Ti                         | 531.0 (O 1s)           |                        |
| OH–Ti                        | 532.2 (O 1s)           |                        |
| O–H ( $\text{H}_2\text{O}$ ) | 533.7 (O 1s)           |                        |
| F–Ti                         | 685.2 (O 1s)           |                        |
| Cl–Ti                        | 198.4 ( $2p_{3/2}$ )   | 200.0 ( $2p_{1/2}$ )   |

**Table S3.** Atomic percentage of  $\text{Ti}_2\text{AlC}$  synthesized by solid-liquid reaction method and  $l\text{-Ti}_2\text{CT}_x$  MXene.

| Samples                    | C     | Al    | Cl   | K | Ti    | Cu   | O     | F    |
|----------------------------|-------|-------|------|---|-------|------|-------|------|
| $\text{Ti}_2\text{AlC}$    | 28.63 | 24.23 | -    | - | 46.67 | 0.47 | -     | -    |
| $l\text{-Ti}_2\text{CT}_x$ | 18.56 | 0.59  | 5.72 | - | 27.55 | 0.12 | 38.72 | 8.73 |

**Table S4.** Simulation results of the EIS spectra in **Fig. 6**.

|                  | $R_s/\Omega$ | $CPE_1\text{-T/F}$ | $CPE_1\text{-P}$ | $R_{ct}/\Omega$ | $CPE_2\text{-T/F}$ | $CPE_2\text{-P}$ | $R_m/\Omega$ | $CPE_3\text{-T/F}$ | $CPE_3\text{-P}$ |
|------------------|--------------|--------------------|------------------|-----------------|--------------------|------------------|--------------|--------------------|------------------|
| Fresh cell       | 5.48E+00     | 1.90E-05           | 8.50E-01         | 8.11E+01        | 2.47E-03           | 7.83E-01         |              |                    |                  |
| Error/%          | 1.51E-02     | 7.19E-02           | 9.15E-03         | 1.20E-02        | 9.84E-03           | 6.00E-03         |              |                    |                  |
| 3 V-Discharge    | 2.82E+00     | 1.30E-05           | 8.49E-01         | 1.45E+02        | 3.61E-03           | 5.39E-01         |              |                    |                  |
| Error/%          | 2.67E-02     | 7.37E-02           | 9.29E-03         | 1.86E-02        | 1.88E-02           | 1.57E-02         |              |                    |                  |
| 2.25 V-Discharge | 2.65E+00     | 1.45E-05           | 8.44E-01         | 1.41E+02        | 3.30E-03           | 6.52E-01         | 6.04E+01     | 3.09E-02           | 7.85E-01         |
| Error/%          | 2.16E-02     | 7.70E-02           | 1.29E-02         | 4.70E-02        | 2.33E-01           | 2.07E-01         | 2.43E-01     | 9.47E-02           | 3.93E-02         |
| 1.5 V-Discharge  | 2.69E+00     | 1.46E-05           | 8.43E-01         | 1.30E+02        | 1.41E-02           | 5.43E-01         | 6.48E+01     | 1.08E-01           | 8.06E-01         |
| Error/%          | 2.02E-02     | 5.99E-02           | 8.33E-03         | 2.08E-02        | 1.39E-01           | 1.21E-01         | Fixed        | 1.73E-01           | 7.39E-02         |
| 0.75 V-Discharge | 2.87E+00     | 1.34E-05           | 8.54E-01         | 1.24E+02        | 3.32E-03           | 7.52E-01         | 5.17E+01     | 4.04E-02           | 6.73E-01         |
| Error/%          | 1.69E-02     | 5.53E-02           | 7.13E-03         | 2.30E-02        | 2.09E-01           | 1.35E-01         | 1.75E-01     | 1.33E-01           | 6.12E-02         |
| 0.05 V           | 2.99E+00     | 1.34E-05           | 8.56E-01         | 1.17E+02        | 2.91E-03           | 7.69E-01         | 6.48E+01     | 8.61E-02           | 7.45E-01         |
| Error/%          | 1.69E-02     | 5.58E-02           | 6.98E-03         | 1.99E-02        | 1.52E-01           | 9.35E-02         | 1.12E-01     | 1.93E-01           | 8.28E-02         |
| 0.75 V-Charge    | 3.42E+00     | 1.31E-05           | 8.56E-01         | 1.28E+02        | 2.66E-03           | 7.81E-01         | 6.51E+01     | 4.47E-02           | 6.86E-01         |
| Error/%          | 1.51E-02     | 5.21E-02           | 6.57E-03         | 1.91E-02        | 1.56E-01           | 9.61E-02         | 1.25E-01     | 1.35E-01           | 6.17E-02         |
| 1.5 V-Charge     | 3.12E+00     | 1.32E-05           | 8.54E-01         | 1.27E+02        | 2.81E-03           | 7.30E-01         | 6.25E+01     | 1.04E-01           | 8.07E-01         |
| Error/%          | 1.57E-02     | 5.43E-02           | 7.20E-03         | 2.39E-02        | 1.67E-01           | 1.09E-01         | 1.17E-01     | 1.74E-01           | 7.11E-02         |
| 2.25 V-Charge    | 3.10E+00     | 1.33E-05           | 8.45E-01         | 1.34E+02        | 3.12E-03           | 6.87E-01         | 5.22E+01     | 3.71E-02           | 7.65E-01         |
| Error/%          | 1.65E-02     | 6.04E-02           | 9.02E-03         | 3.37E-02        | 2.29E-01           | 1.69E-01         | 1.91E-01     | 8.85E-02           | 3.80E-02         |
| 3 V-Charge       | 3.00E+00     | 1.33E-05           | 8.47E-01         | 1.52E+02        | 3.88E-03           | 5.35E-01         |              |                    |                  |
| Error/%          | 2.27E-02     | 6.35E-02           | 8.07E-03         | 1.62E-02        | 1.75E-02           | 1.44E-02         |              |                    |                  |



**Table S5.** Simulation results of the EIS spectra in **Fig. S13**.

|                  | $R_s/\Omega$ | $CPE_1$ -<br>T/F | $CPE_1$ -P | $R_{ct}/\Omega$ | $CPE_2$ -T/F | $CPE_2$ -P | $R_m/\Omega$   | $CPE_3$ -T/F | $CPE_3$ -P |
|------------------|--------------|------------------|------------|-----------------|--------------|------------|----------------|--------------|------------|
| Fresh cell       | 1.77E+00     | 1.32E-05         | 8.10E-01   | 1.73E+02        | 2.34E-03     | 7.00E-01   |                |              |            |
| Error/%          | 4.13E-02     | 6.37E-02         | 7.82E-03   | 1.37E-02        | 1.47E-02     | 9.74E-03   |                |              |            |
| 3 V-Discharge    | 2.01E+00     | 1.91E-05         | 7.61E-01   | 1.22E+02        | 3.41E-03     | 4.93E-01   |                |              |            |
| Error/%          | 4.92E-02     | 7.92E-02         | 1.06E-02   | 1.98E-02        | 1.58E-02     | 1.43E-02   |                |              |            |
| 2.25 V-Discharge | 2.17E+00     | 1.93E-05         | 7.57E-01   | 1.31E+02        | 5.63E-03     | 5.40E-01   | $7.87E+0$<br>1 | 1.92E-02     | 6.80E-01   |
| Error/%          | 4.97E-02     | 9.53E-02         | 1.61E-02   | 5.04E-02        | 1.84E-01     | 2.19E-01   | 2.31E-01       | 3.82E-02     | Fixed      |
| 1.5 V-Discharge  | 2.23E+00     | 1.76E-05         | 7.62E-01   | 1.28E+02        | 9.34E-03     | 6.00E-01   | $7.97E+0$<br>1 | 3.06E-02     | 6.50E-01   |
| Error/%          | 3.88E-02     | 6.33E-02         | 8.16E-03   | 1.31E-02        | 1.18E-01     | Fixed      | 8.69E-02       | 4.81E-02     | Fixed      |
| 0.75 V-Discharge | 2.42E+00     | 1.12E-05         | 8.07E-01   | 1.30E+02        | 4.11E-03     | 6.53E-01   | $8.36E+0$<br>1 | 2.37E-02     | 6.93E-01   |
| Error/%          | 2.93E-02     | 6.42E-02         | 8.34E-03   | 2.32E-02        | 1.59E-01     | 1.32E-01   | 2.24E-01       | 1.44E-01     | 6.04E-02   |
| 0.05 V           | 2.53E+00     | 7.86E-06         | 8.38E-01   | 1.56E+02        | 1.91E-03     | 7.84E-01   | $1.08E+0$<br>2 | 7.23E-02     | 8.22E-01   |
| Error/%          | 2.41E-02     | 5.00E-02         | 5.90E-03   | 1.39E-02        | 1.06E-01     | 6.00E-02   | 6.96E-02       | 1.51E-01     | 6.14E-02   |
| 0.75 V-Charge    | 2.51E+00     | 8.16E-06         | 8.33E-01   | 1.61E+02        | 1.72E-03     | 8.04E-01   | $9.58E+0$<br>1 | 2.57E-02     | 7.41E-01   |
| Error/%          | 2.35E-02     | 4.75E-02         | 5.63E-03   | 1.39E-02        | 1.24E-01     | 6.65E-02   | 8.41E-02       | 7.76E-02     | 3.51E-02   |
| 1.5 V-Charge     | 2.42E+00     | 1.01E-05         | 8.16E-01   | 1.42E+02        | 2.96E-03     | 6.76E-01   | $7.74E+0$<br>1 | 4.32E-02     | 6.46E-01   |
| Error/%          | 2.62E-02     | 5.61E-02         | 7.15E-03   | 2.06E-02        | 1.33E-01     | 9.22E-02   | 8.16E-02       | 4.67E-02     | Fixed      |
| 2.25 V-Charge    | 2.26E+00     | 1.40E-05         | 7.88E-01   | 1.24E+02        | 5.93E-03     | 5.50E-01   | $7.18E+0$<br>1 | 3.18E-02     | 7.00E-01   |
| Error/%          | 3.17E-02     | 5.97E-02         | 7.55E-03   | 1.56E-02        | 1.31E-01     | Fixed      | 5.40E-02       | 3.20E-02     | Fixed      |
| 3 V-Charge       | 1.98E+00     | 2.02E-05         | 7.58E-01   | 1.21E+02        | 3.76E-03     | 4.93E-01   |                |              |            |
| Error/%          | 4.91E-02     | 7.82E-02         | 1.05E-02   | 1.96E-02        | 1.67E-02     | 1.49E-02   |                |              |            |

**Table S6.** Formation energy of  $\text{Ti}_2\text{CO}_2\text{Li}_x$  super cell.

| Li coverage | $E_f$     |
|-------------|-----------|
| 0           | 0.00E+00  |
| 0.25        | -1.86E+00 |
| 0.5         | -3.76E+00 |
| 0.75        | -5.09E+00 |
| 1           | -6.40E+00 |
| 1.25        | -7.29E+00 |
| 1.5         | -8.27E+00 |
| 1.75        | -9.11E+00 |
| 2           | -9.90E+00 |
